# Supplementary material for: Structural Insights into the UbiD Protein Family from the Crystal Structure of PA0254 from Pseudomonas aeruginosa
Source: PubMed Central journal article supplement (PMC3650080; doi:10.1371/journal.pone.0063161), 2013-05-09
Supplement: pone.0063161.s002.pdf [file pone.0063161.s002.pdf]

## Supplementary Figure S2.

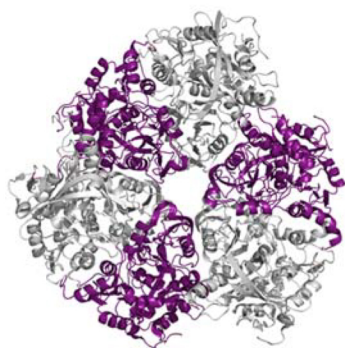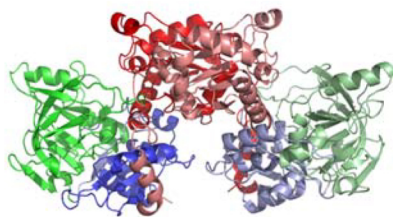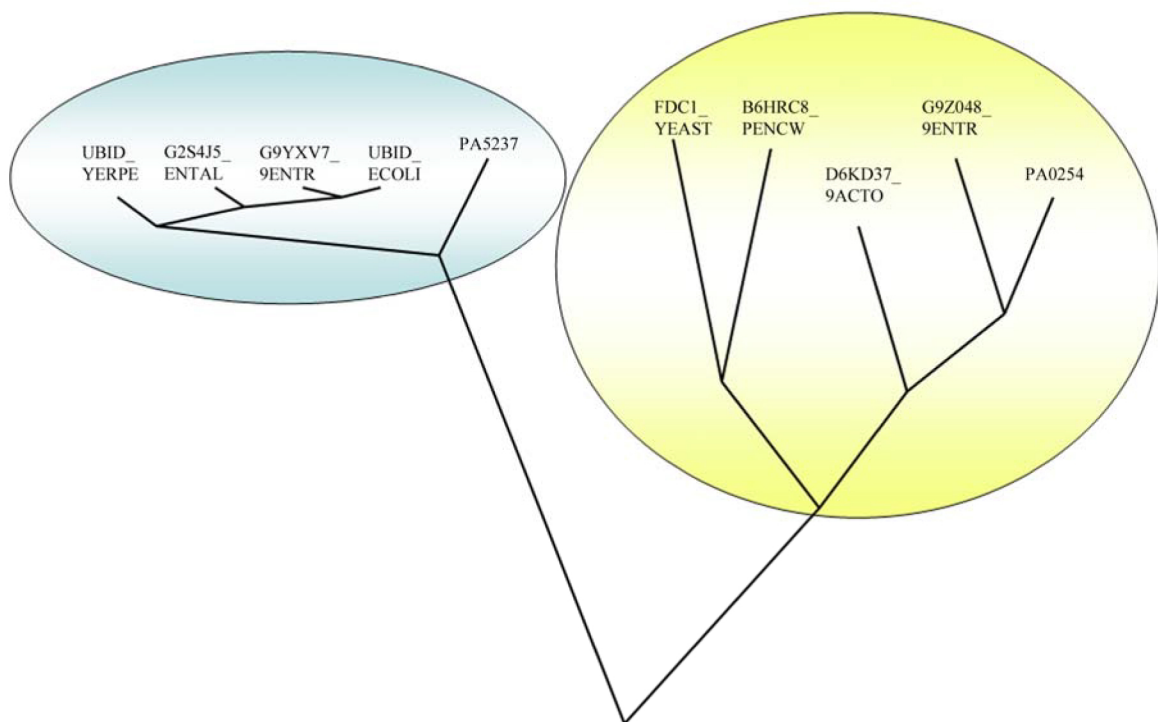

**Figure S2.** Phylogenetic tree generated at [www.cbrg.ethz.ch/services/PhylogeneticTree](http://www.cbrg.ethz.ch/services/PhylogeneticTree) based on the sequences of UbiD-like proteins used in the alignment in Figure 2. The members of this sequence family are clustered in two groups, one harboring the hexameric *bona fide* UbiD-like enzymes (to the left) exemplified by UbiD from *E. coli* (PDB code 2IDB). The second group comprises UbiD2-like proteins, represented by dimeric PA0254 described in this paper.
