# Supplementary material for: Structural Insights into the UbiD Protein Family from the Crystal Structure of PA0254 from Pseudomonas aeruginosa
Source: PubMed Central journal article supplement (PMC3650080; doi:10.1371/journal.pone.0063161), 2013-05-09
Supplement: pone.0063161.s003.pdf [file pone.0063161.s003.pdf]

### Supplementary Figure S3.

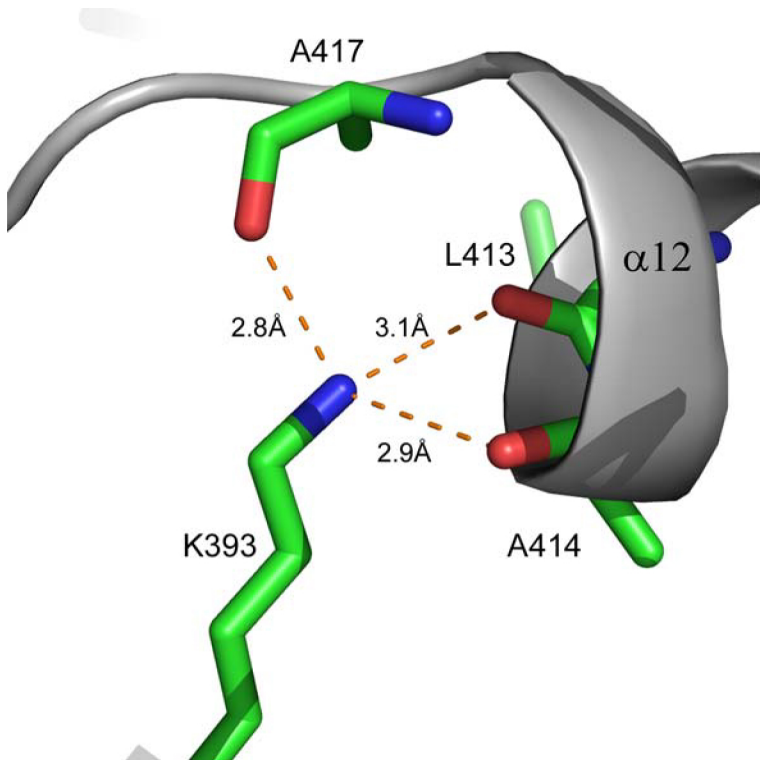

**Figure S3.** In the dimer interface Lys393 is engaged in interactions with the residues from helix  $\alpha 12$  of the second subunit. The  $\epsilon$ -amino group of Lys393 potentially forms hydrogen bonds with the carbonyl oxygen atoms of Ala414, Leu413 and Ala417. Hydrogen bonds are displayed as dashed lines with the distances indicated.
