# Supplementary material for: Structural Insights into the UbiD Protein Family from the Crystal Structure of PA0254 from Pseudomonas aeruginosa
Source: PubMed Central journal article supplement (PMC3650080; doi:10.1371/journal.pone.0063161), 2013-05-09
Supplement: pone.0063161.s004.pdf [file pone.0063161.s004.pdf]

# Structural insights into the UbiD protein family from the crystal structure of PA0254 from *Pseudomonas aeruginosa*

Agata Jacewicz, Atsushi Izumi, Katharina Brunner, Robert Schnell and Gunter Schneider  
Department of Medical Biochemistry and Biophysics, Karolinska Institutet, Stockholm, Sweden.

## Supplementary Figure S1.

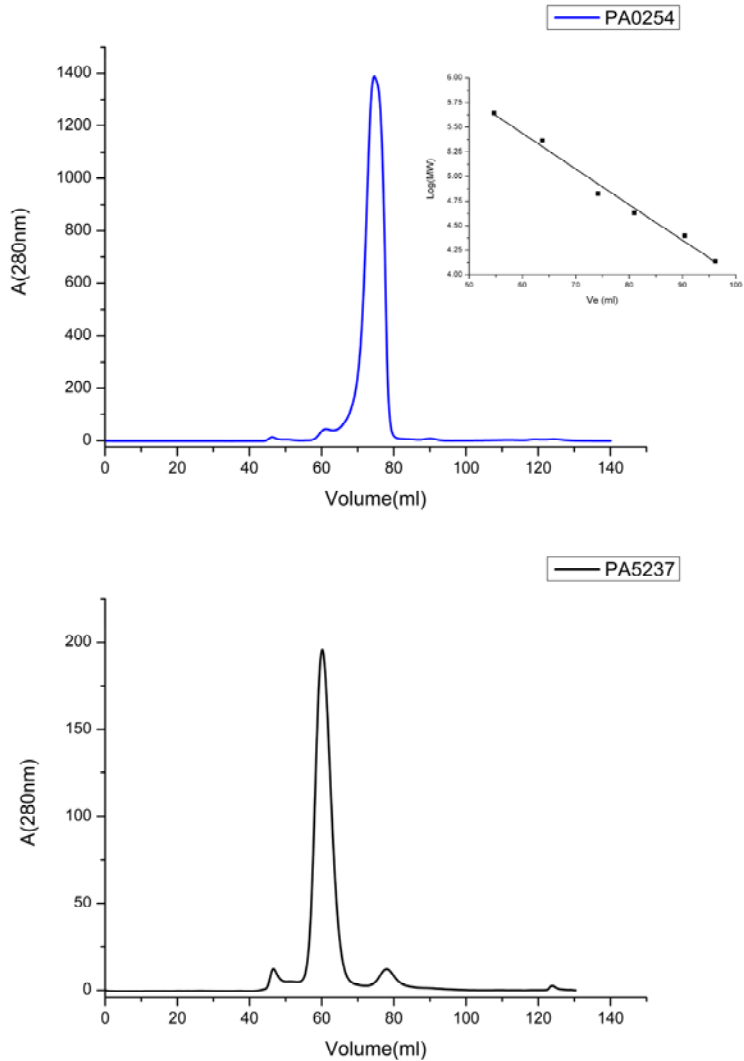

**Figure S1.** Elution profile of PA0254 (UbiD2, top panel) and PA5237 (UbiD1, lower panel) from size exclusion chromatography using a superdex-200 column (GE-Healthcare) calibrated with Ribonuclease-A (13,7 kDa) Chymotrypsinogen-A (25 kDa) Ovalbumin (43 kDa) Albumin (67 kDa) Catalase (232 kDa) and Ferretin (440 kDa). The data for the calibration curve is shown in the insert in the top-panel. The absorbance at 280 nm is displayed as mAU. The elution volume of PA0254 at 75 ml corresponds to a molecular weight of 85 kDa. The peak position of PA5237 at 57 ml indicates a mass of 353 kDa corresponding to a hexameric arrangement.

Supplementary Figure S2.

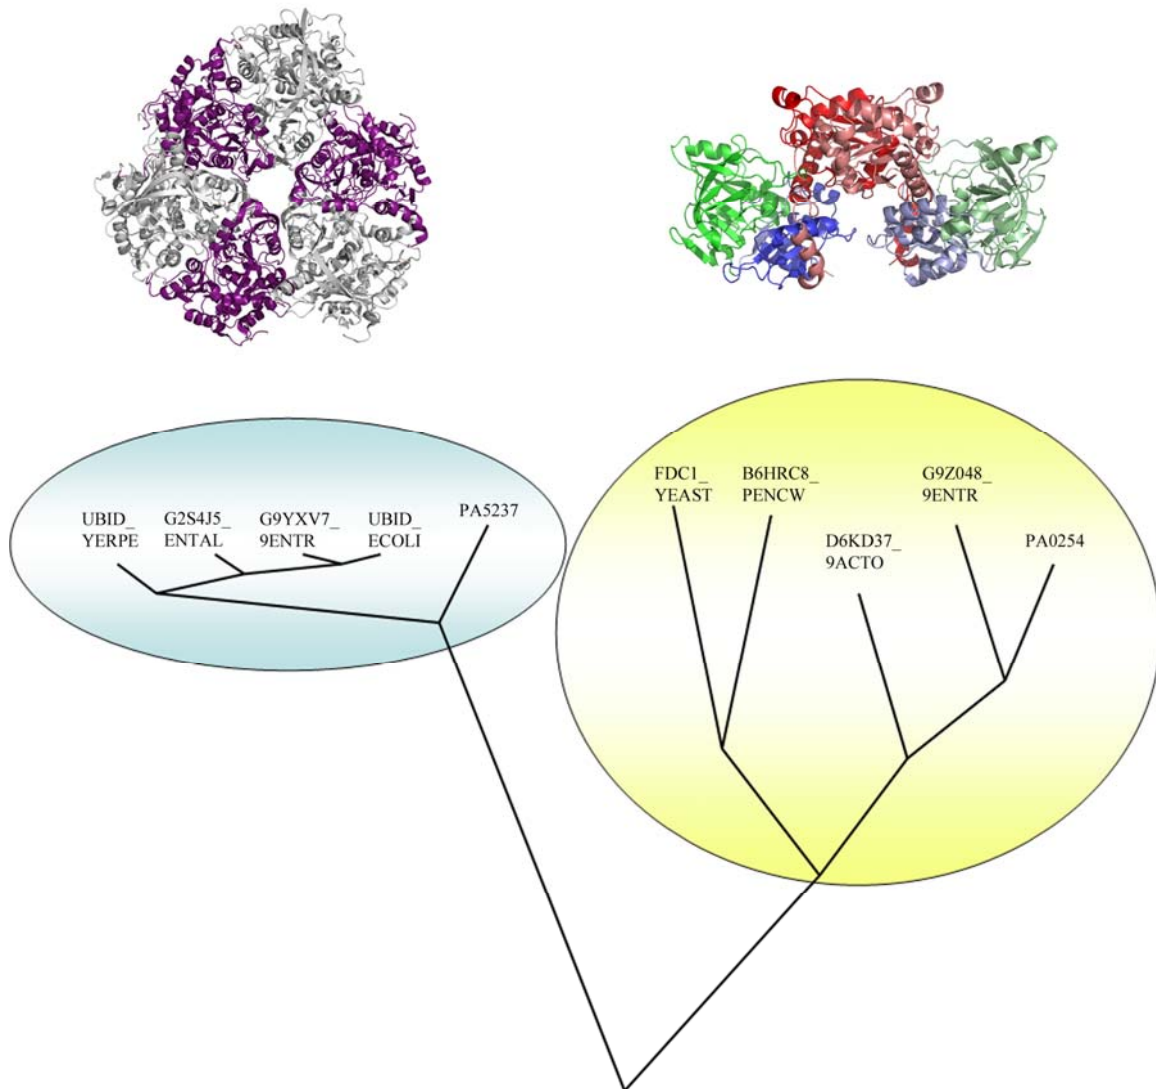

**Figure S2.** Phylogenetic tree generated at [www.cbrg.ethz.ch/services/PhylogeneticTree](http://www.cbrg.ethz.ch/services/PhylogeneticTree) based on the sequences of UbiD-like proteins used in the alignment in Figure 2. The members of this sequence family are clustered in two groups, one harboring the hexameric *bona fide* UbiD-like enzymes (to the left) exemplified by UbiD from *E. coli* (PDB code 2IDB). The second group comprises UbiD2-like proteins, represented by dimeric PA0254 described in this paper.

**Supplementary Figure S3.**

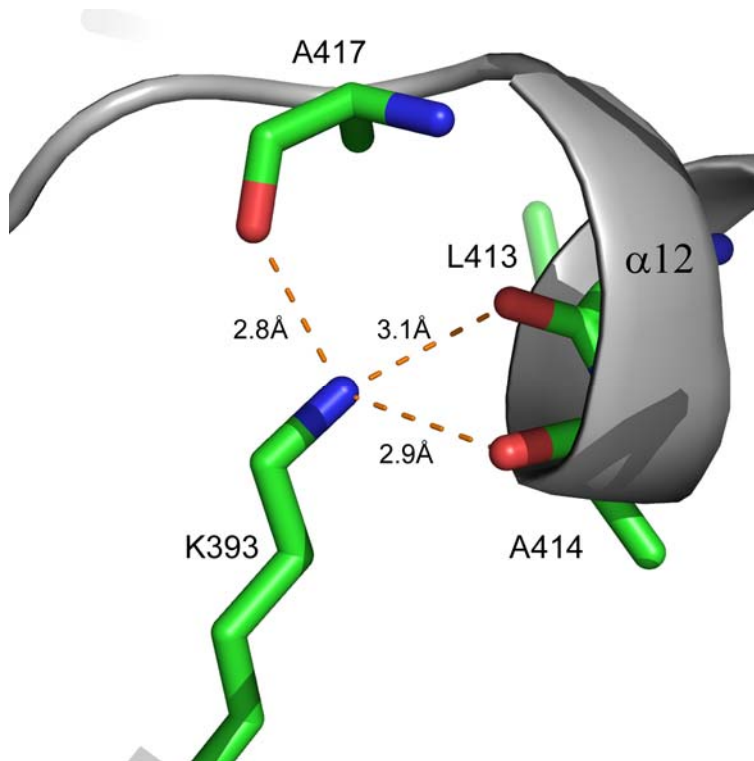

**Figure S3.** In the dimer interface Lys393 is engaged in interactions with the residues from helix  $\alpha 12$  of the second subunit. The  $\epsilon$ -amino group of Lys393 potentially forms hydrogen bonds with the carbonyl oxygen atoms of Ala414, Leu413 and Ala417. Hydrogen bonds are displayed as dashed lines with the distances indicated.
